# Supplementary material
Source: Springer Nature journal article supplement (https://www.springermedizin.de/resource/supplementary/12889_2013_5531_MOESM1_ESM.pdf/9495356)
Supplement: MOESM1 [file 9495356]

**Table S1 Effect sizes and standard errors for the fixed effects in the base model and the full model**

|                               | Base     |         | Full     |         |
|-------------------------------|----------|---------|----------|---------|
|                               | Estimate | SE      | Estimate | SE      |
| IPV index                     | 0.04743  | 0.01509 | 0.03551  | 0.01621 |
| age (splined)                 |          |         |          |         |
| component 1                   | -0.54443 | 0.58223 | -0.63539 | 0.59051 |
| component 2                   | -1.02540 | 0.57724 | -1.27208 | 0.59491 |
| component 3                   | -2.63396 | 1.40718 | -3.01919 | 1.43845 |
| component 4                   | -0.33521 | 0.49996 | -0.57664 | 0.52675 |
| religion (baseline, Catholic) |          |         |          |         |
| Christian                     | -0.06632 | 0.23405 | 0.03557  | 0.24213 |
| Muslim                        | -0.47225 | 0.48921 | -0.29248 | 0.49063 |
| None/Other                    | 0.46731  | 0.58514 | 0.49063  | 0.59453 |
| education (baseline, None)    |          |         |          |         |
| Primary                       | -0.45471 | 0.41505 | -0.45464 | 0.41493 |
| Secondary                     | -0.91526 | 0.47662 | -0.85293 | 0.48101 |
| Higher                        | -0.88158 | 0.57200 | -0.76530 | 0.58494 |
| rural (vs. urban)             | -0.43553 | 0.29732 | -0.44199 | 0.30571 |
| Wealth (splined)              |          |         |          |         |
| component 1                   | 1.11960  | 0.77732 | 1.07358  | 0.78005 |
| component 2                   | 1.31175  | 2.87058 | 0.89175  | 2.85478 |
| component 3                   | 0.86579  | 0.93091 | 0.53757  | 0.94813 |
| working (yes)                 | 0.50700  | 0.21297 | 0.48532  | 0.21630 |
| age gap(splined)              |          |         |          |         |
| component 1                   | -0.34023 | 0.44475 | -0.33733 | 0.45730 |
| component 2                   | -2.99492 | 1.20215 | -2.67019 | 1.25094 |
| component 3                   | -0.22889 | 0.47735 | -0.23690 | 0.49898 |
| number of partners (year)     |          |         | -1.23828 | 1.08831 |
| number of partners (lifetime) |          |         | 0.18925  | 0.07482 |
| Condom usage (baseline, No)   |          |         |          |         |
| Yes                           |          |         | 0.91431  | 0.37804 |
| Not asked                     |          |         | -0.45889 | 1.20085 |
| other wives                   |          |         | 0.21083  | 0.12198 |
| male alcohol                  |          |         | 0.37932  | 0.20293 |
